# Supplementary material for: Personalized prediction of adverse heart and kidney events using baseline and longitudinal data from SPRINT and ACCORD
Source: PubMed Central journal article supplement (PMC6687091; doi:10.1371/journal.pone.0219728), 2019-08-08
Supplement: pone.0219728.s015.pdf [file pone.0219728.s015.pdf]

| Outcome                                     | Intensive Treatment<br>(N = 4678)                             | Standard Treatment<br>(N = 4683) | Hazard Ratio<br>(95% CI) |
|---------------------------------------------|---------------------------------------------------------------|----------------------------------|--------------------------|
| Primary CV outcome no. (%)                  | 243 (5.2)                                                     | 319 (6.8)                        | 0.75 (0.64-0.89)         |
| Acute Renal Injury or Renal Failure no. (%) | 204 (4.4)                                                     | 120 (2.6)                        | 1.71                     |
|                                             | Participants without Chronic Kidney Disease (CKD) at baseline |                                  |                          |
|                                             | Intensive Treatment<br>(N = 3332)                             | Standard Treatment<br>(N = 3345) |                          |
| Novel CKD no. (%)                           | 127 (3.8)                                                     | 37 (1.1)                         | 3.49 (2.44-5.10)         |

**S2 Table.** The relevant results of the SPRINT study. Hazard ratio p-value < 0.001 for all outcomes.
