# Supplementary material for: Personalized prediction of adverse heart and kidney events using baseline and longitudinal data from SPRINT and ACCORD
Source: PubMed Central journal article supplement (PMC6687091; doi:10.1371/journal.pone.0219728), 2019-08-08
Supplement: pone.0219728.s016.pdf [file pone.0219728.s016.pdf]

| Characteristic                                                                                              | Percent of sampling runs in which the characteristic appeared in the final model (N=10000) | Mean   | SD     |
|-------------------------------------------------------------------------------------------------------------|--------------------------------------------------------------------------------------------|--------|--------|
| <b>F statistic p-value for the overall significance of the linear model</b>                                 | 100                                                                                        | 2.153  | 0.438  |
| <b>R<sup>2</sup> for correlation between the measured BP values and those predicted by the linear model</b> | 100                                                                                        | 4.094  | 0.850  |
| <b>Difference between maximal and minimal measured BP values</b>                                            | 100                                                                                        | -0.037 | 0.009  |
| Past Clinical CV event                                                                                      | 96.6                                                                                       | 1.049  | 0.374  |
| Intensive treatment                                                                                         | 96.03                                                                                      | -0.413 | 0.173  |
| Number of hypertensive agents                                                                               | 94.17                                                                                      | 0.156  | 0.081  |
| Ratio of urinary albumin to creatinine                                                                      | 94.11                                                                                      | 0.001  | 0.0008 |
| Framingham 10 years risk score                                                                              | 92.6                                                                                       | 0.024  | 0.012  |
| Age                                                                                                         | 90.12                                                                                      | 0.027  | 0.015  |
| Serum creatinine                                                                                            | 89.99                                                                                      | 0.74   | 0.477  |
| <b>Slope of linear model</b>                                                                                | 89.02                                                                                      | 0.003  | 0.098  |
| Current smoker                                                                                              | 87.46                                                                                      | 0.413  | 0.280  |
| Female sex                                                                                                  | 87.37                                                                                      | 0.416  | 0.251  |
| Former smoker                                                                                               | 82.68                                                                                      | 0.162  | 0.157  |
| <b>Mean pulse pressure</b>                                                                                  | 80.82                                                                                      | 0.012  | 0.009  |

|                             |       |         |       |
|-----------------------------|-------|---------|-------|
| Statin usage                | 74.59 | -0.035  | 0.165 |
| BMI                         | 72.93 | 0.001   | 0.014 |
| Ethnic white                | 72.26 | -0.289  | 0.258 |
| Ethnic Hispanic             | 71.28 | 0.159   | 0.642 |
| Chronic kidney disease      | 70.18 | -0.023  | 0.237 |
| Cholesterol                 | 62.43 | 0.001   | 0.002 |
| HDL/Cholesterol ratio       | 57.77 | -1.125  | 1.24  |
| EGFR/Serum creatinine ratio | 56.72 | 0.003   | 0.002 |
| Pulse pressure at baseline  | 54.17 | -0.0009 | 0.007 |
| HDL                         | 47.67 | -0.002  | 0.006 |
| Ethnic black                | 30.68 | 0.078   | 0.178 |
| EGFR                        | 16.79 | -0.003  | 0.003 |

**S3 Table.** Feature importance for predicting Primary CV outcome by the longitudinal model (using t=6, logistic regression). Bold: summary statistics extracted from longitudinal data. Mean coefficients and SD are calculated using 10000 repeats. Positive mean coefficient implies positive risk for CV event.
