# Supplementary material for: Personalized prediction of adverse heart and kidney events using baseline and longitudinal data from SPRINT and ACCORD
Source: PubMed Central journal article supplement (PMC6687091; doi:10.1371/journal.pone.0219728), 2019-08-08
Supplement: pone.0219728.s017.pdf [file pone.0219728.s017.pdf]

| Characteristic                         | Percent of sampling runs in which the characteristic appeared in the final model (N=10000) | Mean   | SD     |
|----------------------------------------|--------------------------------------------------------------------------------------------|--------|--------|
| Serum creatinine                       | 71.2                                                                                       | 1.474  | 1.064  |
| Ratio of urinary albumin to creatinine | 71.05                                                                                      | 0.0015 | 0.0022 |
| Intensive treatment                    | 69.91                                                                                      | 0.604  | 0.631  |
| Past subclinical CV event              | 60.59                                                                                      | -0.282 | 1.103  |
| Former smoker                          | 60.04                                                                                      | 0.346  | 0.644  |
| Pulse pressure at baseline             | 58.12                                                                                      | 0.011  | 0.024  |
| Number of hypertensive agents          | 58.01                                                                                      | 0.149  | 0.306  |
| BMI                                    | 57.40                                                                                      | 0.016  | 0.065  |
| Statin usage                           | 56.85                                                                                      | -0.214 | 0.685  |
| Chronic kidney disease                 | 56.85                                                                                      | 0.688  | 0.726  |
| Current smoker                         | 53.34                                                                                      | 0.509  | 0.933  |
| Framingham 10 years risk score         | 52.31                                                                                      | 0.024  | 0.026  |
| Ethnic white                           | 49.52                                                                                      | -0.394 | 0.818  |
| Past clinical CV event                 | 49.39                                                                                      | 0.643  | 0.777  |
| Cholesterol                            | 47.64                                                                                      | -0.003 | 0.009  |
| Ethnic black                           | 45.54                                                                                      | 0.498  | 0.632  |
| Female sex                             | 42.77                                                                                      | -0.311 | 0.718  |
| HDL to cholesterol ratio               | 40.45                                                                                      | 2.971  | 4.204  |
| Age                                    | 40.24                                                                                      | 0.024  | 0.043  |

|                                |       |         |       |
|--------------------------------|-------|---------|-------|
| HDL                            | 38.55 | -0.0003 | 0.027 |
| EGFR to serum creatinine ratio | 30.41 | -0.006  | 0.011 |
| Past clinical CV event         | 27.10 | 0.160   | 0.844 |
| Ethnic Hispanic                | 23.17 | 0.058   | 1.367 |
| EGFR                           | 18.99 | -0.018  | 0.020 |

**S4 Table.** Feature importance for predicting acute kidney injury or renal failure by the baseline model (CoxPH). Mean coefficients and SD are calculated using 10000 iterations. Mean coefficient > 1 implies positive risk effect for CV event.
