# Supplementary material for: Personalized prediction of adverse heart and kidney events using baseline and longitudinal data from SPRINT and ACCORD
Source: PubMed Central journal article supplement (PMC6687091; doi:10.1371/journal.pone.0219728), 2019-08-08
Supplement: pone.0219728.s018.pdf [file pone.0219728.s018.pdf]

| Characteristic                         | Percent of sampling runs in which the characteristic occurred as a significant feature ( $\beta \neq 0$ : p-value < 0.01, N=10000) | Mean   | SD     |
|----------------------------------------|------------------------------------------------------------------------------------------------------------------------------------|--------|--------|
| Pulse pressure                         | 100                                                                                                                                | 1.035  | 0.002  |
| Intensive treatment                    | 100                                                                                                                                | 3.316  | 0.204  |
| Ratio of urinary albumin to creatinine | 90.63                                                                                                                              | 1.0006 | 0.0001 |
| Female sex                             | 18.3                                                                                                                               | 2.096  | 0.560  |

**S5 Table.** Feature importance for predicting novel Chronic Kidney Disease (CKD) for non-CKD patients at baseline by the baseline model (CoxPH). Mean coefficients and SD are calculated using 1000 iterations. Mean coefficient > 1 implies positive risk effect for CV event.
