# Supplementary material for: Personalized prediction of adverse heart and kidney events using baseline and longitudinal data from SPRINT and ACCORD
Source: PubMed Central journal article supplement (PMC6687091; doi:10.1371/journal.pone.0219728), 2019-08-08
Supplement: pone.0219728.s019.pdf [file pone.0219728.s019.pdf]

| <b>Outcome</b> | <b>Recommended Intensive (N=4246)</b> | <b>Recommended Standard (N=5115)</b> | <b>HR (95% CI)</b>  | <b>P-value</b> |
|----------------|---------------------------------------|--------------------------------------|---------------------|----------------|
| CV events (%)  | 287 (0.067)                           | 275 (0.053)                          | 1.341(1.136-1.583)  | 0.002          |
| AKI events (%) | 124 (0.029)                           | 200 (0.039)                          | 0.676 (0.539-0.848) | 0.018          |

**S6 Table.** Hazard ratios for tested outcomes based on the recommended assignments of our method. Our assignment shows significant increase in CV hazard for the group of patients that would have been recommended intensive treatment along with significant decrease in hazard for AKI.
