# Supplementary material for: Personalized prediction of adverse heart and kidney events using baseline and longitudinal data from SPRINT and ACCORD
Source: PubMed Central journal article supplement (PMC6687091; doi:10.1371/journal.pone.0219728), 2019-08-08
Supplement: pone.0219728.s020.pdf [file pone.0219728.s020.pdf]

|                                 |           |                            |          |
|---------------------------------|-----------|----------------------------|----------|
| P-value for interaction: 0.3292 |           | <b>Original assignment</b> |          |
|                                 |           | Intensive                  | Standard |
| <b>Recommended assignment</b>   | Intensive | 2098                       | 2148     |
|                                 | standard  | 2580                       | 2535     |

**S7 Table.** Breakdown of patient assignment to treatment arms by the SPRINT study and by our recommendation system. The recommended assignment of patients to the two arms is not biased towards any of the original arms.
